# Supplementary material for: Aging Reveals a Role for Nigral Tyrosine Hydroxylase ser31 Phosphorylation in Locomotor Activity Generation
Source: PLoS One. 2009 Dec 23;4(12):e8466. doi: 10.1371/journal.pone.0008466 (PMC2791868; doi:10.1371/journal.pone.0008466)
Supplement: Table S1 — Habituation of locomotion. (0.04 MB DOC) [file pone.0008466.s007.doc]

**TABLE S1: Habituation of locomotion**

| **Rat ID** | **Mean ± SEM**  **session #’s 1-5** | **Mean ± SEM**  **session #’s 6-10** | ***p*** |
| --- | --- | --- | --- |
| **y-1*** | **223 ± 20** | **153 ± 17** | **0.03** |
| **o-1*** | **165 ± 6** | **118 ± 14** | **0.02** |
| **y-2** | **301 ± 22** | **258 ± 30** | **0.27** |
| **o-2** | **110 ± 30** | **82 ± 23** | **0.48** |
| **y-3** | **245 ± 29** | **183 ± 27** | **0.16** |
| **o-3** | **115 ± 10** | **118 ± 19** | **0.91** |
| **y-4** | **292 ± 30** | **202 ± 37** | **0.09** |
| **o-4** | **118 ± 16** | **95 ± 13** | **0.28** |
| **y-5** | **241 ± 32** | **146 ± 28** | **0.06** |
| **o-5*** | **147 ± 24** | **75 ± 9** | **0.02** |
| **y-6*** | **293 ± 35** | **405 ± 28** | **0.04** |
| **o-6** | **145 ± 17** | **130 ± 9** | **0.44** |
| **y-7** | **271 ± 39** | **174 ± 29** | **0.08** |
| **o-7*** | **142 ± 5** | **84 ± 6** | **0.0001** |

**Table S1.** Comparison of mean movement number between the first five and last five testing trials in the first session of young (y) and old (o) BNF F1 hybrid rats. Five of the 14 subjects showed a significant change in movement number between the first five and second five locomotor test trials, in one case this was an increase (y-6).
